# Supplementary material for: Developing infrared spectroscopic detection for stratifying brain tumour patients: glioblastoma multiforme vs. lymphoma
Source: Royal Society of Chemistry journal article supplement (doi:10.1039/c9an01731c), 2019-01-01
Supplement: c9an01731c4.pdf [file c9an01731c4.pdf]

|            |            | Reference |            |
|------------|------------|-----------|------------|
|            |            | Cancer    | Non-Cancer |
| Prediction | a) Cancer  | 136       | 13         |
|            | Non-Cancer | 10        | 58         |

|            |            | Reference |            |
|------------|------------|-----------|------------|
|            |            | Cancer    | Non-Cancer |
| Prediction | b) Cancer  | 134       | 7          |
|            | Non-Cancer | 12        | 64         |
