# Supplementary material for: Developing infrared spectroscopic detection for stratifying brain tumour patients: glioblastoma multiforme vs. lymphoma
Source: Royal Society of Chemistry journal article supplement (doi:10.1039/c9an01731c), 2019-01-01
Supplement: c9an01731c7.pdf [file c9an01731c7.pdf]

|           |          | Reference |          |
|-----------|----------|-----------|----------|
|           |          | GBM       | Lymphoma |
| Predicted | GBM      | 20        | 3        |
|           | Lymphoma | 2         | 11       |
